# Supplementary material
Source: HighWire-hosted journal article supplement (http://www.jrheum.org/highwire/filestream/31549/field_highwire_adjunct_files/0/161286DataSuppl.pdf)
Supplement: 161286DataSuppl.pdf [file 161286DataSuppl.pdf]

## ONLINE SUPPLEMENTARY DATA

*Supplementary Table 1.* Comparison of clinical manifestation in patients with AOSD and patients with MAS. Values are expressed as n (%).

| Clinical manifestation | AOSD patients (n=64) |                 |         | AOSD patients with MAS (n=36) |                        |         |
|------------------------|----------------------|-----------------|---------|-------------------------------|------------------------|---------|
|                        | Without MAS (n=28)   | With MAS (n=36) | p-value | On admission (n=22)           | After admission (n=14) | p-value |
| Fever <sup>†</sup>     | 23 (82.1)            | 28 (77.7)       | 0.669   | 17 (77.2)                     | 11 (78.5)              | 0.928   |
| Joint pain             | 23 (82.1)            | 22 (61.1)       | 0.069   | 14 (63.6)                     | 8 (57.1)               | 0.700   |
| Skin rash              | 12 (42.8)            | 12 (33.3)       | 0.438   | 9 (40.9)                      | 3 (21.4)               | 0.233   |
| Leukocytosis           | 25 (89.2)            | 25 (69.4)       | 0.058   | 15 (68.1)                     | 10 (71.4)              | 0.838   |
| Sore throat            | 16 (57.1)            | 19 (52.7)       | 0.729   | 11 (50.0)                     | 8 (57.1)               | 0.679   |
| Lymphadenopathy        | 18 (64.2)            | 23 (63.8)       | 0.974   | 13 (59.0)                     | 10 (71.4)              | 0.458   |
| Hepatosplenomegaly     | 4 (14.2)             | 8 (22.2)        | 0.423   | 4 (18.1)                      | 4 (28.5)               | 0.471   |

<sup>†</sup>Fever was defined as a body temperature of over 39°C according to the Yamaguchi criteria for AOSD.

**Supplementary Table 2.** The use of glucocorticoids and other immunosuppressive agents in patients with adult-onset Still disease (AOSD).

|                                                   | AOSD patients (n=64)  |                            | AOSD patients with MAS (n=36)        |                                   |
|---------------------------------------------------|-----------------------|----------------------------|--------------------------------------|-----------------------------------|
|                                                   | Without MAS (n=28)    | With MAS (n=36)            | Without in-hospital mortality (n=24) | With in-hospital mortality (n=12) |
| Cumulative glucocorticoid dose (mg), median (IQR) | 245.0<br>(95.0-557.5) | 2142.5<br>(320.0-4610.0)** | 1055.0<br>(270-4610.0)               | 3337.5<br>(920.0-4667.5)          |
| Glucocorticoid dose/day (mg), median (IQR)        | 28.6<br>(20.0-46.0)   | 86.9<br>(34.8-287.9)**     | 60.2<br>(25.4-209.0)                 | 135.8<br>(72.7-307.1)             |
| Steroid pulse therapy, n (%)                      | 6 (21.4)              | 10 (27.7)                  | 7 (29.1)                             | 3 (25.0)                          |
| Immunosuppressive Agent, n, (%)                   |                       |                            |                                      |                                   |
| Methotrexate                                      | 6 (21.4)              | 4 (11.1)                   | 4 (16.6)                             | 0 (0.0)                           |
| Cyclosporine                                      | 3 (10.7)              | 13 (36.1)*                 | 8 (33.3)                             | 5 (41.6)                          |
| Etoposide                                         | 0 (0.0)               | 6 (16.6)*                  | 2 (8.3)                              | 4 (33.0)                          |
| Tocilizumab                                       | 1 (3.5)               | 3 (8.3)                    | 1 (4.1)                              | 2 (16.6)                          |
| Anakinra                                          | 0 (0.0)               | 1 (2.7)                    | 0 (0.0)                              | 1 (8.3)                           |
| Infliximab                                        | 0 (0.0)               | 1 (2.7)                    | 1 (4.1)                              | 0 (0.0)                           |
| Cyclophosphamide                                  | 0 (0.0)               | 1 (2.7)                    | 1 (4.1)                              | 0 (0.0)                           |
| IV immunoglobulin                                 | 0 (0.0)               | 5 (13.8)*                  | 1 (4.1)                              | 4 (33.3)*                         |

Values are expressed as the medians (interquartile ranges) or n (%).

IV, intravenous.

\*p < 0.05; \*\*p < 0.001 for differences between the two groups.
